# Supplementary material for: The Association of Endothelin-1 with Markers of Arterial Stiffness in Black South African Women: The SABPA Study
Source: PubMed Central journal article supplement (PMC4707353; doi:10.1155/2015/481517), 2015-12-28
Supplement: 481517.f1.pdf [file 481517.f1.pdf]

**SUPPLEMENTAL MATERIAL**

**Supplementary Table 1.** Single correlations of endothelin-1 with cardiovascular and metabolic markers in black and white men and women.

|                                               | Endothelin-1 (pg/mL) |                   |                  |                  |
|-----------------------------------------------|----------------------|-------------------|------------------|------------------|
|                                               | Men (n = 198)        |                   | Women (n = 193)  |                  |
|                                               | Black (n = 99)       | White (n = 99)    | Black (n = 95)   | White (n = 98)   |
| Age (years)                                   | r=0.041; p=0.69      | r=-0.104; p=0.30  | r=0.26; p=0.009  | r=-0.006; p=0.96 |
| Body mass index (kg/m <sup>2</sup> )          | r=0.030; p=0.77      | r=0.065; p=0.52   | r=0.17; p=0.093  | r=0.056; p=0.58  |
| Waist circumference (mm)                      | r=0.055; p=0.59      | r=0.096; p=0.34   | r=0.14; p=0.17   | r=0.051; p=0.62  |
| <b>Cardiovascular variables</b>               |                      |                   |                  |                  |
| Systolic blood pressure (mmHg)                | r=0.12; p=0.24       | r=0.049; p=0.63   | r=0.27; p=0.008  | r=0.14; p=0.18   |
| Diastolic blood pressure (mmHg)               | r=0.048; p=0.65      | r=0.153; p=0.13   | r=0.12; p=0.27   | r=-0.024; p=0.82 |
| Pulse pressure (mmHg)                         | r=0.14; p=0.19       | r=-0.069; p=0.50  | r=0.25; p=0.014  | r=0.19; p=0.063  |
| Mean arterial pressure (mmHg)                 | r=0.087; p=0.40      | r=0.089; p=0.38   | r=0.20; p=0.053  | r=0.065; p=0.52  |
| Stroke volume (mL)                            | r=0.13; p=0.22       | r=-0.093; p=0.36  | r=0.11; p=0.30   | r=0.23; p=0.026  |
| Arterial compliance (mL/mmHg)                 | r=-0.008; p=0.94     | r=-0.011; p=0.91  | r=-0.078; p=0.45 | r=0.13; p=0.22   |
| Pulse wave velocity (m/s)                     | r=0.15; p=0.15       | r=0.118; p=0.25   | r=0.23; p=0.026  | r=0.11; p=0.27   |
| <b>Biochemical analyses</b>                   |                      |                   |                  |                  |
| C-Reactive Protein (mg/L)                     | r=0.015; p=0.88      | r=0.178; p=0.078  | r=0.090; p=0.38  | r=-0.016; p=0.87 |
| Interleukin-6 (pg/mL)                         | r=-0.017; p=0.87     | r=-0.139; p=0.17  | r=0.27; p=0.007  | r=-0.118; p=0.25 |
| Glycated hemoglobin A1c (%)                   | r=-0.024; p=0.81     | r=0.020; p=0.84   | r=0.16; p=0.13   | r=0.010; p=0.92  |
| High density lipoprotein cholesterol (mmol/L) | r=0.040; p=0.69      | r=0.137; p=0.18   | r=0.23; p=0.026  | r=0.041; p=0.69  |
| Low density lipoprotein cholesterol (mmol/L)  | r=0.025; p=0.81      | r=-0.040; p=0.69  | r=0.011; p=0.91  | r=-0.090; p=0.38 |
| Total cholesterol (mmol/L)                    | r=0.100; p=0.32      | r=0.004; p=0.97   | r=0.082; p=0.43  | r=-0.059; p=0.56 |
| Triglycerides (mmol/L)                        | r=0.155; p=0.12      | r=-0.010; p=0.92  | r=0.030; p=0.77  | r=0.002; p=0.98  |
| Albumin-to-creatinine ratio (mg/mmol/L)       | r=0.040; p=0.70      | r=-0.069; p=0.50  | r=0.046; p=0.66  | r=0.093; p=0.36  |
| Cotinine (ng/mL)                              | r=-0.17; p=0.32      | r=0.044; p=0.87   | r=0.28; p=0.24   | r=0.65; p=0.41   |
| Gamma glutamyl transferase (U/L)              | r=0.18; p=0.075      | r=-0.170; p=0.092 | r=0.15; p=0.15   | r=-0.018; p=0.86 |
